# Supplementary material for: The Prevalence of COVID-19 Vaccination and Vaccine Hesitancy in Pregnant Women: An Internet-based Cross-sectional Study in Japan
Source: PubMed Central journal article supplement (PMC8918615; doi:10.2188/jea.je20210458), 2022-04-05
Supplement: je-32-188-s001.pdf [file je-32-188-s001.pdf]

**eTable 1.** Prefecture distribution of participants and all Japanese women between the ages of 20 and 50 years old

|           | All pregnant women |       | Women between the ages of 20 and 50 years old <sup>a</sup> |       |
|-----------|--------------------|-------|------------------------------------------------------------|-------|
|           | n=1,621            |       | n=21,385,480                                               |       |
|           | N                  | %     | N                                                          | %     |
| Hokkaido  | 69                 | 4.3%  | 852,270                                                    | 4.0%  |
| Aomori    | 12                 | 0.7%  | 186,850                                                    | 0.9%  |
| Iwate     | 15                 | 0.9%  | 180,134                                                    | 0.8%  |
| Miyagi    | 26                 | 1.6%  | 395,843                                                    | 1.9%  |
| Akita     | 8                  | 0.5%  | 133,611                                                    | 0.6%  |
| Yamagata  | 8                  | 0.5%  | 157,451                                                    | 0.7%  |
| Fukushima | 13                 | 0.8%  | 283,832                                                    | 1.3%  |
| Ibaraki   | 28                 | 1.7%  | 457,670                                                    | 2.1%  |
| Tochigi   | 13                 | 0.8%  | 311,780                                                    | 1.5%  |
| Gunma     | 14                 | 0.9%  | 303,765                                                    | 1.4%  |
| Saitama   | 84                 | 5.2%  | 1,278,916                                                  | 6.0%  |
| Chiba     | 86                 | 5.3%  | 1,079,368                                                  | 5.0%  |
| Tokyo     | 215                | 13.3% | 2,732,942                                                  | 12.8% |
| Kanagawa  | 141                | 8.7%  | 1,637,391                                                  | 7.7%  |
| Niigata   | 23                 | 1.4%  | 339,664                                                    | 1.6%  |
| Toyama    | 17                 | 1.0%  | 160,076                                                    | 0.7%  |
| Ishikawa  | 10                 | 0.6%  | 185,127                                                    | 0.9%  |
| Fukui     | 10                 | 0.6%  | 119,996                                                    | 0.6%  |
| Yamanashi | 4                  | 0.2%  | 124,586                                                    | 0.6%  |
| Nagano    | 21                 | 1.3%  | 314,660                                                    | 1.5%  |
| Gifu      | 19                 | 1.2%  | 311,264                                                    | 1.5%  |
| Shizuoka  | 33                 | 2.0%  | 571,764                                                    | 2.7%  |
| Aichi     | 136                | 8.4%  | 1,296,231                                                  | 6.1%  |
| Mie       | 24                 | 1.5%  | 280,724                                                    | 1.3%  |
| Shiga     | 22                 | 1.4%  | 241,726                                                    | 1.1%  |
| Kyoto     | 42                 | 2.6%  | 433,516                                                    | 2.0%  |
| Osaka     | 143                | 8.8%  | 1,592,330                                                  | 7.4%  |

|           |    |      |         |      |
|-----------|----|------|---------|------|
| Hyogo     | 73 | 4.5% | 940,222 | 4.4% |
| Nara      | 18 | 1.1% | 220,184 | 1.0% |
| Wakayama  | 13 | 0.8% | 145,974 | 0.7% |
| Tottori   | 3  | 0.2% | 85,885  | 0.4% |
| Shimane   | 11 | 0.7% | 97,532  | 0.5% |
| Okayama   | 16 | 1.0% | 311,301 | 1.5% |
| Hiroshima | 52 | 3.2% | 462,122 | 2.2% |
| Yamaguchi | 15 | 0.9% | 201,415 | 0.9% |
| Tokushima | 3  | 0.2% | 112,767 | 0.5% |
| Kagawa    | 14 | 0.9% | 155,547 | 0.7% |
| Hiroshima | 10 | 0.6% | 210,105 | 1.0% |
| Kochi     | 2  | 0.1% | 104,624 | 0.5% |
| Fukuoka   | 66 | 4.1% | 911,395 | 4.3% |
| Saga      | 10 | 0.6% | 130,220 | 0.6% |
| Nagasaki  | 13 | 0.8% | 201,256 | 0.9% |
| Kumamoto  | 26 | 1.6% | 275,514 | 1.3% |
| Oita      | 9  | 0.6% | 174,646 | 0.8% |
| Miyazaki  | 5  | 0.3% | 166,417 | 0.8% |
| Kagoshima | 15 | 0.9% | 248,916 | 1.2% |
| Okinawa   | 11 | 0.7% | 265,951 | 1.2% |

---

<sup>a</sup> Women aged 20 to 50 years old by prefecture were extracted from government data<sup>1</sup>.

**eTable 2.** Trends in the declaration of a state of emergency and semi-emergency in prefectures in Japan during the survey period

---

| State of emergency |                                                               |
|--------------------|---------------------------------------------------------------|
| 05/23/2021         | Okinawa                                                       |
| 07/12/2021         | Tokyo                                                         |
| 08/02/2021         | Saitama, Chiba, Kanagawa, Osaka                               |
| 08/20/2021         | Ibaraki, Tochigi, Gunma, Shizuoka, Kyoto, Hyogo, Fukuoka      |
| 08/27/2021         | Hokkaido, Miyagi, Gifu, Aichi, Mie, Shiga, Okayama, Hiroshima |

---

| State of semi emergency |                                                                                                                            |
|-------------------------|----------------------------------------------------------------------------------------------------------------------------|
| 08/02/2021              | Hokkaido (08/26), Ishikawa, Kyoto (08/19), Hyogo (08/19), Fukuoka (08/19)                                                  |
| 08/08/2021              | Fukushima, Ibaraki (08/19), Tochigi (08/19), Gunma (08/19), Shizuoka (08/19), Aichi (08/26), Shiga (08/26), Kumamoto       |
| 08/20/2021              | Miyagi (08/26), Toyama, Yamanashi, Gifu (08/26), Mie (08/26), Okayama (08/26), Hiroshima (08/26), Kagawa, Ehime, Kagoshima |
| 08/27/2021              | Kochi, Saga, Nagasaki, Miyazaki                                                                                            |

---

All declarations were still in place on August 30, 2021, at the end of the survey period.

**eTable 3.** The reasons for vaccine hesitancy and acceptance among all pregnant women in the study population

|                                                                   | Already been vaccinated<br>n=217 | Want to be vaccinated<br>n=579 | Want to 'wait and see' before getting the vaccine<br>n=689 | Do not want to be vaccinated<br>n=136 |
|-------------------------------------------------------------------|----------------------------------|--------------------------------|------------------------------------------------------------|---------------------------------------|
| I do not have time to get vaccinated                              | -                                | -                              | 114 (16.5)                                                 | 13 (9.6)                              |
| I am worried about adverse reactions                              | -                                | -                              | 576 (83.6)                                                 | 113 (83.1)                            |
| I am concerned about the potential effects on my fetus            | -                                | -                              | 588 (85.3)                                                 | 120 (88.2)                            |
| I am concerned about the potential effect on lactation            | -                                | -                              | 466 (67.6)                                                 | 94 (69.1)                             |
| I do not think it is very effective                               | -                                | -                              | 146 (21.2)                                                 | 60 (44.1)                             |
| I do not think it is very effective in preventing severe symptoms | -                                | -                              | 82 (11.9)                                                  | 42 (30.9)                             |
| I do not trust the components of vaccines                         | -                                | -                              | 338 (49.1)                                                 | 111 (81.6)                            |
| I do not think I will get infected                                | -                                | -                              | 22 (3.2)                                                   | 14 (10.3)                             |
| I think I have a low risk of getting seriously ill                | -                                | -                              | 45 (6.5)                                                   | 18 (13.2)                             |
| It was recommended by a family member or friend                   | 84 (38.7)                        | 231 (39.9)                     | 103 (14.9)                                                 | 23 (16.9)                             |
| It was recommended by SNS or the media                            | 66 (30.4)                        | 195 (33.7)                     | 59 (8.6)                                                   | 5 (3.7)                               |
| I am worried about getting infected with COVID-19                 | 195 (89.9)                       | 551 (95.2)                     | 343 (49.8)                                                 | -                                     |
| I think I have a high risk of becoming seriously ill              | 140 (64.5)                       | 288 (49.7)                     | 149 (21.6)                                                 | -                                     |
| I am a medical worker                                             | 61 (28.1)                        | 70 (12.1)                      | 48 (7.0)                                                   | -                                     |

|                                                                                                  |            |            |            |   |
|--------------------------------------------------------------------------------------------------|------------|------------|------------|---|
| I do not want to infect my family or other people around me                                      | 193 (88.9) | 534 (92.2) | 402 (58.3) | - |
| I think it is necessary for society to be vaccinated                                             | 173 (79.7) | 443 (76.5) | 257 (37.3) | - |
| I am more worried about getting a severe infection than I am about the risk of adverse reactions | 189 (87.1) | 493 (85.1) | 270 (39.2) | - |

---

Values are given as frequency (percentage).

COVID-19, coronavirus disease 2019; SNS, social networking service.

## REFERENCES

1. Population, demographics, and number of households based on the Basic Resident Ledger. [https://www.soumu.go.jp/main\\_sosiki/jichi\\_gyousei/daityo/jinkou\\_jinkoudoutai-setaisuu.html](https://www.soumu.go.jp/main_sosiki/jichi_gyousei/daityo/jinkou_jinkoudoutai-setaisuu.html). 2021. Accessed 11.26.2021.
